# Supplementary material
Source: HighWire-hosted journal article supplement (https://erj.ersjournals.com/content/49/6/1601361)
Supplement: inline-supplementary-material-1 [file inline-supplementary-material-1.pdf]

**Obstructive Sleep Apnea is Not a Risk Factor for Incident Hospitalized Depression: A Historical Cohort Study**

Tetyana Kendzerska, Andrea S. Gershon, Gillian Hawker, George Tomlinson, Richard S. Leung

1. **Table E1.** List of variables collected in sleep laboratory.
2. **Table E2.** Description of codes used to define hospitalization for depression from health administrative data.
3. **Table E3.** Information about variables derived from health administrative data.

**Table E1.** List of variables collected in sleep laboratory (each patient in the cohort underwent an overnight full standard polysomnography recording which was scored manually by a sleep technologist and reviewed by a board-certified sleep physician).

| Name                                                                        | Description                                                         | Measurement                                                                                                       |
|-----------------------------------------------------------------------------|---------------------------------------------------------------------|-------------------------------------------------------------------------------------------------------------------|
| <b>Demographic characteristics (self-reported by patients)</b>              |                                                                     |                                                                                                                   |
| Sex                                                                         |                                                                     | Male/Female                                                                                                       |
| Age                                                                         |                                                                     | years                                                                                                             |
| <b>Symptoms related to OSA (self-reported by patients)</b>                  |                                                                     |                                                                                                                   |
| <i>Daytime sleepiness</i>                                                   |                                                                     |                                                                                                                   |
| Epworth Sleepiness Scale, total                                             | Total score                                                         | ranged from 0 to 24                                                                                               |
| Item #1                                                                     | Sitting and reading                                                 | 0 = would never doze<br>1 = slight chance of dozing<br>2 = moderate chance of dozing<br>3 = high chance of dozing |
| Item #2                                                                     | Watching TV                                                         | from 0 to 3                                                                                                       |
| Item #3                                                                     | Sitting inactive in a public place (e.g. a theatre or at a meeting) | from 0 to 3                                                                                                       |
| Item #4                                                                     | As a passenger in a car for an hour without a break                 | from 0 to 3                                                                                                       |
| Item #5                                                                     | Lying down in the afternoon when circumstances permit               | from 0 to 3                                                                                                       |
| Item #6                                                                     | Sitting and talking to someone                                      | from 0 to 3                                                                                                       |
| Item #7                                                                     | Sitting quietly after a lunch without alcohol                       | from 0 to 3                                                                                                       |
| Item #8                                                                     | In a car while stopped for a few minutes in traffic                 | from 0 to 3                                                                                                       |
| Self-reported DS                                                            | "During the day, do you ever fall asleep unintentionally?"          | Yes/No                                                                                                            |
| <i>Other symptoms</i>                                                       |                                                                     |                                                                                                                   |
| Self-reported snoring                                                       | Do you snore?                                                       | Yes/No                                                                                                            |
| Observed cessation of breathing                                             | Has anyone ever told you that you stop breathing while you sleep?   | Yes/No                                                                                                            |
| Observed restless sleeper                                                   | Have you been told that you are a restless sleeper?                 | Yes/No                                                                                                            |
| Wake unrefreshed                                                            | Do you feel refreshed when you wake up?                             | Yes/No                                                                                                            |
| Self-reported morning headache                                              | Do you often wake up with headaches in the morning?                 | Yes/No                                                                                                            |
| Memory and concentration impact                                             | Do you have trouble concentrating or remembering things?            | Y/N                                                                                                               |
| <b>Social History (self-reported by patients)</b>                           |                                                                     |                                                                                                                   |
| Smoking status                                                              |                                                                     | current<br>ex-smoker<br>never                                                                                     |
| Alcohol consumption                                                         | "Y" > 7 alcoholic beverages per week, other - "N"                   | Yes/No                                                                                                            |
| Employment status                                                           | Are you currently working?                                          | Yes/No                                                                                                            |
| <b>Self-reported medical history at baseline</b>                            |                                                                     |                                                                                                                   |
| SR HiBP                                                                     | Do you, or have you ever suffered from high blood pressure?         | Yes/No                                                                                                            |
| SR MI                                                                       | Self-reported myocardial infarction                                 | Yes/No                                                                                                            |
| SR Stroke                                                                   | Self-reported stroke                                                | Yes/No                                                                                                            |
| Use of hypnotic medications                                                 | Do you ever take medication to help you fall asleep?                | Yes/No                                                                                                            |
| <b>Self-reported Family History</b>                                         |                                                                     |                                                                                                                   |
| History of Family Snore                                                     | Does anybody else in your family snore loudly?                      | Yes/No                                                                                                            |
| History of Family Apnea Diagnosis                                           | Has anyone in your family been diagnosed with sleep apnea?          | Yes/No                                                                                                            |
| <b>Physical examination by sleep technician according to the lab manual</b> |                                                                     |                                                                                                                   |
| WGT                                                                         | weight                                                              | kg                                                                                                                |
| HGT                                                                         | Height                                                              | cm                                                                                                                |

|                                                                                         |                                                                                                                                                                                                                                                                                                                                                                                                                                                                                                                                                                                                                                                                                                                                                                                                     |              |
|-----------------------------------------------------------------------------------------|-----------------------------------------------------------------------------------------------------------------------------------------------------------------------------------------------------------------------------------------------------------------------------------------------------------------------------------------------------------------------------------------------------------------------------------------------------------------------------------------------------------------------------------------------------------------------------------------------------------------------------------------------------------------------------------------------------------------------------------------------------------------------------------------------------|--------------|
| NECK                                                                                    | neck circumference                                                                                                                                                                                                                                                                                                                                                                                                                                                                                                                                                                                                                                                                                                                                                                                  | cm           |
| WAIST                                                                                   | waist circumference                                                                                                                                                                                                                                                                                                                                                                                                                                                                                                                                                                                                                                                                                                                                                                                 | cm           |
| HIP                                                                                     | hip circumference                                                                                                                                                                                                                                                                                                                                                                                                                                                                                                                                                                                                                                                                                                                                                                                   | cm           |
| <b>PSG recording: PSG software used is different version of Sandman (current - 7.3)</b> |                                                                                                                                                                                                                                                                                                                                                                                                                                                                                                                                                                                                                                                                                                                                                                                                     |              |
| TST                                                                                     | Time in Bed (TIB) – Sleep Latency (SL)                                                                                                                                                                                                                                                                                                                                                                                                                                                                                                                                                                                                                                                                                                                                                              | hours        |
| Sleep efficiency                                                                        | TST/TIB                                                                                                                                                                                                                                                                                                                                                                                                                                                                                                                                                                                                                                                                                                                                                                                             | %            |
| STAGE1 PER                                                                              | The PSG was scored manually for sleep stage according to established criteria using the EEC, EOG and EMG records <sup>1</sup> .                                                                                                                                                                                                                                                                                                                                                                                                                                                                                                                                                                                                                                                                     | % of stage 1 |
| STAGE2 PER                                                                              |                                                                                                                                                                                                                                                                                                                                                                                                                                                                                                                                                                                                                                                                                                                                                                                                     | % of stage 2 |
| STAGE3 PER                                                                              |                                                                                                                                                                                                                                                                                                                                                                                                                                                                                                                                                                                                                                                                                                                                                                                                     | % of stage 3 |
| STAGE4 PER                                                                              |                                                                                                                                                                                                                                                                                                                                                                                                                                                                                                                                                                                                                                                                                                                                                                                                     | % of stage 4 |
| REM PER                                                                                 |                                                                                                                                                                                                                                                                                                                                                                                                                                                                                                                                                                                                                                                                                                                                                                                                     | % of REM     |
| HRMEAN TST                                                                              | Overall mean heart rate in TST                                                                                                                                                                                                                                                                                                                                                                                                                                                                                                                                                                                                                                                                                                                                                                      | bpm          |
| PLMI TST                                                                                | The number of periodic leg movements per hour of TST                                                                                                                                                                                                                                                                                                                                                                                                                                                                                                                                                                                                                                                                                                                                                | events/hr.   |
| ArI, total                                                                              | Total Arousals index in TST                                                                                                                                                                                                                                                                                                                                                                                                                                                                                                                                                                                                                                                                                                                                                                         | events/hr.   |
| AWK TST                                                                                 | Total Awakenings, number in TST                                                                                                                                                                                                                                                                                                                                                                                                                                                                                                                                                                                                                                                                                                                                                                     | events/TST   |
| MEANO2SAT_TST                                                                           | Overall Mean SaO <sub>2</sub> % in TST                                                                                                                                                                                                                                                                                                                                                                                                                                                                                                                                                                                                                                                                                                                                                              | %            |
| O2SAT90MIN_TST                                                                          | Duration of SaO <sub>2</sub> <90% in TST                                                                                                                                                                                                                                                                                                                                                                                                                                                                                                                                                                                                                                                                                                                                                            | minutes      |
| ProcSat_less90TST                                                                       | % of SaO <sub>2</sub> <90%, in TST                                                                                                                                                                                                                                                                                                                                                                                                                                                                                                                                                                                                                                                                                                                                                                  | %            |
| <b>Apnea and hypopnea events</b>                                                        |                                                                                                                                                                                                                                                                                                                                                                                                                                                                                                                                                                                                                                                                                                                                                                                                     |              |
| Obstructive apnea/hypopnea event                                                        | Must fulfill criterion 1 or 2, plus criterion 3 of the following <sup>2</sup> :<br>1. A clear decrease (>50%) from baseline in the amplitude of a valid measure of breathing during sleep. Baseline is defined as the mean amplitude of stable breathing and oxygenation in the two minutes preceding onset of the event (in individuals who have a stable breathing pattern during sleep) or the mean amplitude of the three largest breaths in the two minutes preceding onset of the event (in individuals without a stable breathing pattern).<br>2. A clear amplitude reduction of a validated measure of breathing during sleep that does not reach the above criterion but is associated with either an oxygen desaturation of >3% or an arousal.<br>3. The event lasts 10 seconds or longer |              |
| ApnOI TST                                                                               | Obstructive apnea Index in TST                                                                                                                                                                                                                                                                                                                                                                                                                                                                                                                                                                                                                                                                                                                                                                      | events/hr.   |
| ApnTotI TST                                                                             | Total apnea Index in TST                                                                                                                                                                                                                                                                                                                                                                                                                                                                                                                                                                                                                                                                                                                                                                            | events/hr.   |
| HypOI TST                                                                               | Obstructive hypopneas Index in TST                                                                                                                                                                                                                                                                                                                                                                                                                                                                                                                                                                                                                                                                                                                                                                  | events/hr.   |
| HypTotI TST                                                                             | Total hypopneas Index in TST                                                                                                                                                                                                                                                                                                                                                                                                                                                                                                                                                                                                                                                                                                                                                                        | events/hr.   |
| AHIO TST                                                                                | Obstructive apnea-hypopneas Index in TST                                                                                                                                                                                                                                                                                                                                                                                                                                                                                                                                                                                                                                                                                                                                                            | events/hr.   |
| AHIO NREM                                                                               | Obstructive apnea-hypopneas Index in NREM                                                                                                                                                                                                                                                                                                                                                                                                                                                                                                                                                                                                                                                                                                                                                           | events/hr.   |
| AHIO REM                                                                                | Obstructive apnea-hypopneas Index in REM                                                                                                                                                                                                                                                                                                                                                                                                                                                                                                                                                                                                                                                                                                                                                            | events/hr.   |
| AHI TST                                                                                 | Total apnea-hypopneas Index in TST                                                                                                                                                                                                                                                                                                                                                                                                                                                                                                                                                                                                                                                                                                                                                                  | events/hr.   |
| AHITot NREM                                                                             | Total apnea-hypopneas Index in NREM                                                                                                                                                                                                                                                                                                                                                                                                                                                                                                                                                                                                                                                                                                                                                                 | events/hr.   |
| AHITot REM                                                                              | Total apnea-hypopneas Index in REM                                                                                                                                                                                                                                                                                                                                                                                                                                                                                                                                                                                                                                                                                                                                                                  | events/hr.   |
| AHDUR MEAN                                                                              | Total apnea-hypopneas, Mean Duration                                                                                                                                                                                                                                                                                                                                                                                                                                                                                                                                                                                                                                                                                                                                                                | min          |
| AHDUR MAX                                                                               | Total apnea-hypopneas, Longest Event                                                                                                                                                                                                                                                                                                                                                                                                                                                                                                                                                                                                                                                                                                                                                                | min          |

**Table E2.** Description of codes used to define hospitalization for depression from health administrative data.

| <b>DSM-IV</b> | <b>Description</b>                                        | <b>ICD-9</b> | <b>Description</b>                            | <b>ICD-10</b> | <b>Description</b>                                     |
|---------------|-----------------------------------------------------------|--------------|-----------------------------------------------|---------------|--------------------------------------------------------|
|               |                                                           |              |                                               | F20.4         | Post-schizophrenic depression                          |
| 296.2         | Major depressive disorder, single episode                 | 296.2        | Major depressive disorder single, episode     | F32.x         | Depressive episode                                     |
| 296.3         | Major depressive disorder, recurrent                      | 296.3        | Major depressive disorder, recurrent episode  | F33.x         | Recurrent depressive disorder                          |
| 296.5         | Bipolar I disorder, most recent episode depressed         | 296.5        | Bipolar affective disorder, depressed         | F31.3-F31.5   | Bipolar affective disorder, current episode depression |
| 300.4         | Dysthymic disorder                                        | 300.4        | Neurotic depression                           | F34.1         | Dysthymia                                              |
| 309.0         | Adjustment disorder with depressed mood                   | 309.0        | Brief depressive reaction                     | F43.2         | Adjustment disorders                                   |
| 309.28        | Adjustment disorder with mixed anxiety and depressed mood |              |                                               |               |                                                        |
| 311           | Depressive disorder NOS                                   | 311          | Depressive disorder, not elsewhere classified |               |                                                        |

DSM-IV - the Diagnostic and Statistical Manual of Mental Disorders, 4th Edition; ICD - International Classification of Diseases.

**Table E3.** Information about variables derived from health administrative data.

| <b>Risk factors and other potential confounders</b>  | <b>ICES-derived Cohorts/ Acquired Cohorts / Registries</b>                                                                                                                                                                                                                                                                                                                                                                                                                                                                                                                                                                                                             |
|------------------------------------------------------|------------------------------------------------------------------------------------------------------------------------------------------------------------------------------------------------------------------------------------------------------------------------------------------------------------------------------------------------------------------------------------------------------------------------------------------------------------------------------------------------------------------------------------------------------------------------------------------------------------------------------------------------------------------------|
| <b>Prior CV diseases</b>                             | Based on ICD-9, ICD-10 and OHIP codes for combination of inpatient and outpatient visits for any of the following CV diseases: myocardial infarction, bypass surgery or cardiac stent variables, heart failure and stroke in CIHI/DAD, NACRS or OHIP associated with ED visits.                                                                                                                                                                                                                                                                                                                                                                                        |
| <b>Prior hypertension</b>                            | Ontario Hypertension Database <sup>3</sup>                                                                                                                                                                                                                                                                                                                                                                                                                                                                                                                                                                                                                             |
| <b>Prior CHF</b>                                     | Ontario Congestive Heart Failure Database                                                                                                                                                                                                                                                                                                                                                                                                                                                                                                                                                                                                                              |
| <b>Prior diabetes</b>                                | Ontario Diabetes Dataset <sup>4</sup>                                                                                                                                                                                                                                                                                                                                                                                                                                                                                                                                                                                                                                  |
| <b>Prior COPD</b>                                    | Chronic Obstructive Pulmonary Disease Database <sup>5</sup>                                                                                                                                                                                                                                                                                                                                                                                                                                                                                                                                                                                                            |
| <b>Prior cancer</b>                                  | Ontario Cancer Registry Database <sup>6</sup>                                                                                                                                                                                                                                                                                                                                                                                                                                                                                                                                                                                                                          |
| <b>Prior dementia</b>                                | The presence of dementia defined based on ICD-9, ICD-10 and OHIP codes in CIHI/DAD, NACRS or OHIP.                                                                                                                                                                                                                                                                                                                                                                                                                                                                                                                                                                     |
| <b>Comorbidities at baseline in the last 2 years</b> | Using Hopkins Adjusted Diagnostic Groups (ADGs) <sup>7,8</sup> : 34 diagnosis clusters known as ADGs based on diagnostic certainty, disease duration, severity, etiology, and care involvement. <ul style="list-style-type: none"> <li>• Low comorbidity: 0-5 ADGs</li> <li>• Moderate comorbidity: 6-9 ADGs</li> <li>• High comorbidity: <math>\geq 10</math> ADGs</li> </ul> Classification of comorbidities based on ADGs had been shown accurate for prediction of one-year mortality in subpopulations with chronic diseases including diabetes. So this is a different way on evaluation effect of comorbidities, more from health care utilization perspective. |
| <b>Alcoholism</b>                                    | Based on ICD-9 and ICD-10 codes for: alcohol dependence, alcohol intoxication, alcohol abuse, and alcohol-induced disorder in CIHI/DAD.                                                                                                                                                                                                                                                                                                                                                                                                                                                                                                                                |
| <b>Sociodemographic characteristics at baseline</b>  |                                                                                                                                                                                                                                                                                                                                                                                                                                                                                                                                                                                                                                                                        |
| <b>Urban/rural status</b>                            | <i>Urban/rural status</i> at time of index diagnostic sleep study was defined using patient's postal code <sup>9</sup> .                                                                                                                                                                                                                                                                                                                                                                                                                                                                                                                                               |
| <b>Income Status</b>                                 | Ontario neighbourhoods are classified into one of the five approximately equal-sized income quintiles, ranked from poorest (Q1) to wealthiest (Q5) and these have been shown to be related to population health status and health care utilization <sup>10</sup> . Each patient was assigned to the income quintile based on the patient's postal code at the time of index date and Statistics Canada's Postal Code Conversion File <sup>11,12</sup> .                                                                                                                                                                                                                |

**List of datasets used:** The Registered Persons Database (RPDB), Canadian Institute for Health Information Discharge Abstract database (CIHI-DAD) and the Same Day Surgery (CIHI-SDS), Ontario Health Insurance Plan Physician Services Claims database (OHIP), NACRS - National Ambulatory Care Reporting System, the Ontario Diabetes Database (ODD), HYPERTENSION, Ontario Congestive Heart Failure database (CHF), Ontario Chronic Obstructive Pulmonary Disease database, Ontario Mental Health Reporting System (OMHRS) stand-alone admissions dataset, Ontario Cancer Registry Data (OCD), Ontario Registrar General Death (ORGD) data.

AMI – acute myocardial infarction, CABG - coronary artery bypass graft surgery; CHF – chronic heart failure; COPD – chronic obstructive pulmonary disease, ED – emergency department.

## References

1. Rechtschaffen A, Kales A. *A manual of standardized terminology, techniques and scoring system of sleep stages in human subjects* Los Angeles: Brain Information Service/Brain Research Institute, University of California 1968.
2. Sleep-related breathing disorders in adults: recommendations for syndrome definition and measurement techniques in clinical research. The Report of an American Academy of Sleep Medicine Task Force. *Sleep*. 1999;22(5):667-689.
3. Tu K, Campbell NR, Chen ZL, Cauch-Dudek KJ, McAlister FA. Accuracy of administrative databases in identifying patients with hypertension. *Open medicine : a peer-reviewed, independent, open-access journal*. 2007;1(1):e18-26.
4. Hux JE, Ivis F, Flintoft V, Bica A. Diabetes in Ontario: determination of prevalence and incidence using a validated administrative data algorithm. *Diabetes care*. 2002;25(3):512-516.
5. Gershon AS, Wang C, Guan J, Vasilevska-Ristovska J, Cicutto L, To T. Identifying individuals with physician diagnosed COPD in health administrative databases. *Copd*. 2009;6(5):388-394.
6. Hall S, Schulze K, Groome P, Mackillop W, Holowaty E. Using cancer registry data for survival studies: the example of the Ontario Cancer Registry. *Journal of clinical epidemiology*. 2006;59(1):67-76.
7. Starfield B, Lemke KW, Herbert R, Pavlovich WD, Anderson G. Comorbidity and the use of primary care and specialist care in the elderly. *Annals of family medicine*. 2005;3(3):215-222.
8. Weiner JP, Starfield BH, Steinwachs DM, Mumford LM. Development and application of a population-oriented measure of ambulatory care case-mix. *Medical care*. 1991;29(5):452-472.
9. Ontario Ministry of Health and Long-Term Care. Health Analyst's Toolkit. Available from: [http://www.health.gov.on.ca/english/providers/pub/healthanalytics/health\\_toolkit/health\\_toolkit.pdf](http://www.health.gov.on.ca/english/providers/pub/healthanalytics/health_toolkit/health_toolkit.pdf). 2012.
10. Wilkins R, Tjepkema M, Mustard C, Choiniere R. The Canadian census mortality follow-up study, 1991 through 2001. *Health reports / Statistics Canada, Canadian Centre for Health Information = Rapports sur la sante / Statistique Canada, Centre canadien d'information sur la sante*. 2008;19(3):25-43.
11. Wilkins R. Use of postal codes and addresses in the analysis of health data. *Health reports / Statistics Canada, Canadian Centre for Health Information = Rapports sur la sante / Statistique Canada, Centre canadien d'information sur la sante*. 1993;5(2):157-177.
12. Southern DA, Faris PD, Knudtson ML, Ghali WA. Prognostic relevance of census-derived individual respondent incomes versus household incomes. *Canadian journal of public health = Revue canadienne de sante publique*. 2006;97(2):114-117.
